# Supplementary material for: Co-delivery of vitamin D3 and Lkb1 siRNA by cationic lipid-assisted PEG-PLGA nanoparticles to effectively remodel the immune system in vivo
Source: Royal Society of Chemistry journal article supplement (doi:10.1039/d3bm00767g), 2023-01-01
Supplement: d3bm00767g5.pdf [file d3bm00767g5.pdf]

## Supplement materials

### Co-delivery Vitamin D3 and Lkb1 siRNA by Cationic Lipid -assisted PEG-PLGA Nanoparticles to Effectively Remodel the Immune System *In Vivo*

Haochuan Liu,<sup>a, c</sup> Yuning Zhang,<sup>a, e</sup> He Li,<sup>a, e</sup> Xue Gao,<sup>a</sup> Jialiang Wang,<sup>a, e</sup> Xiuxiu Cong,<sup>a, e</sup> Yanbao Xin,<sup>a, e</sup> Qingsan Zhu,<sup>c</sup> Bing Chen,<sup>d, \*</sup> Yong-Guang Yang<sup>a, b, e</sup>, and Tianmeng Sun<sup>a, b, e, f, \*</sup>

<sup>a</sup>Key Laboratory of Organ Regeneration and Transplantation of Ministry of Education, Jilin University, Changchun, Jilin, 130061, China

<sup>b</sup>International Center of Future Science, Jilin University, Changchun, Jilin, 130015, China

<sup>c</sup>Department of Orthopaedics, China-Japan Union Hospital of Jilin University, Changchun, Jilin, 130031, China

<sup>d</sup>Department of Anesthesiology, China-Japan Union Hospital of Jilin University, Changchun, Jilin, 130031, China

<sup>e</sup>National-local Joint Engineering Laboratory of Animal Models for Human Diseases, Changchun, Jilin, 130062, China

<sup>f</sup>State Key Laboratory of Supramolecular Structure and Materials, Jilin University, Changchun, Jilin, 130012, China

\* Corresponding author

E-mail address: [tsun41@jlu.edu.cn](mailto:tsun41@jlu.edu.cn) (T. Sun) and [chenbing2020@jlu.edu.cn](mailto:chenbing2020@jlu.edu.cn) (B. Chen)

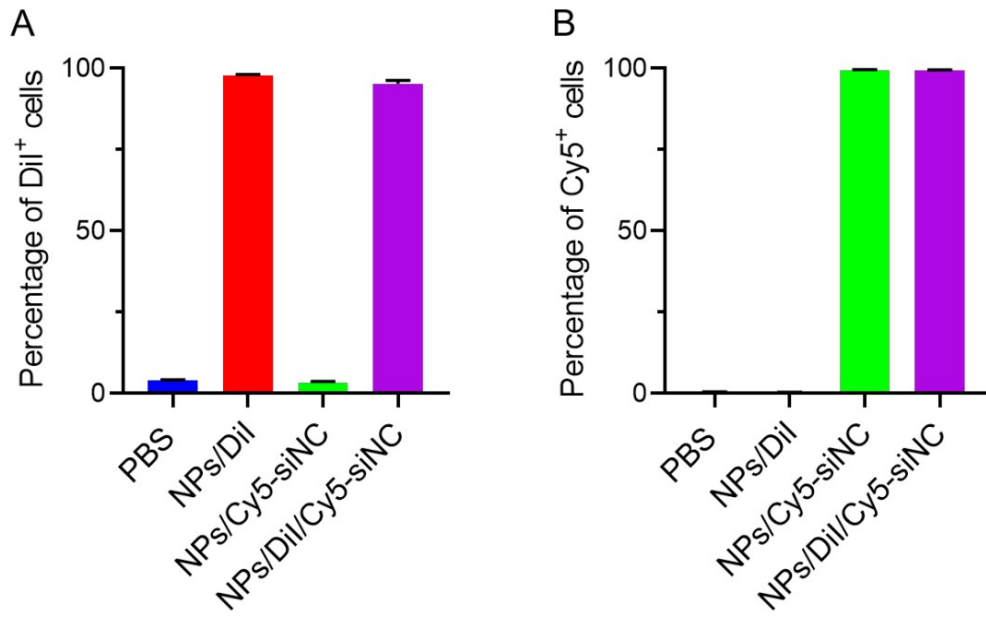

**Figure S1.** Percentage of DiI<sup>+</sup> cells and Cy5<sup>+</sup> cells in DC1.2 cells after stimulation with different nanoparticles was detected by flow cytometry.

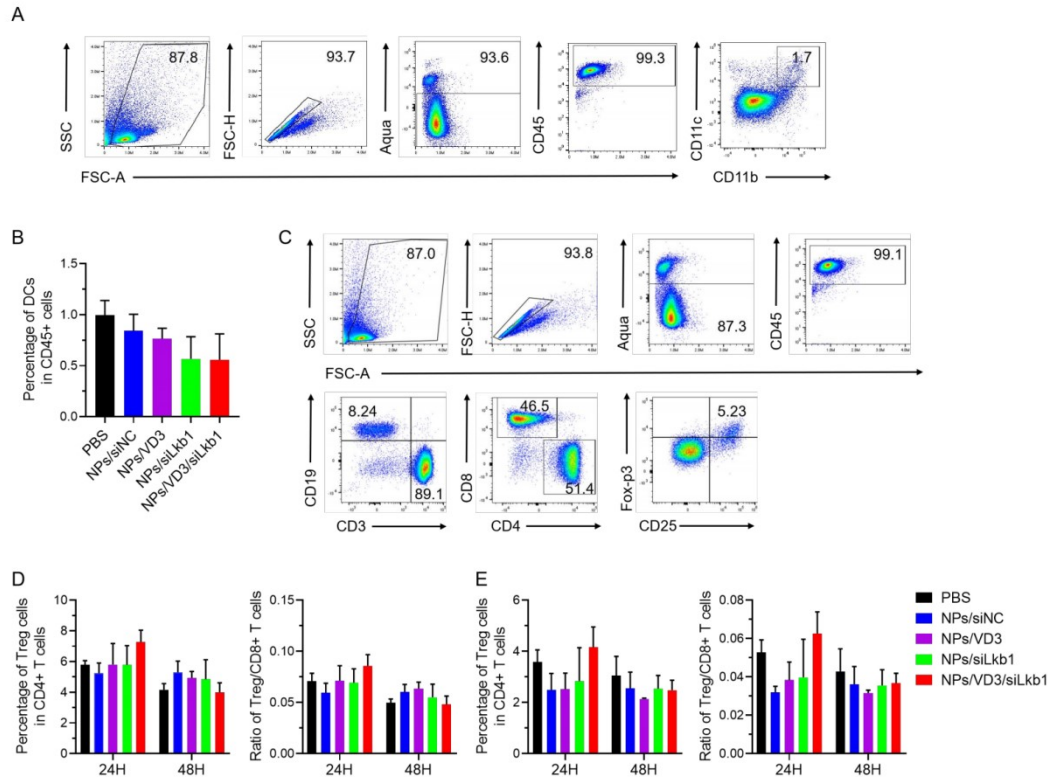

**Figure S2.** (A) Representative flow cytometry of DCs in lymph nodes of C57BL/6 mice 48 hours after intradermal injection. (B) NPs/VD3/siLkb1 decreased the proportion of DCs in CD45+ cells in the draining lymph nodes of C57BL/6 mice 48 hours after intradermal injection. (C) Representative flow cytometry of Tregs in lymph nodes of C57BL/6 mice 24 hours after intradermal injection. (D, E) The percentage of Tregs in CD4+ T cells and ratio of Treg/CD8+ T cells in lymph nodes (D) and spleen (E) 24 h and 48 h after intradermal injection. Data were expressed as mean  $\pm$  S.E.M.

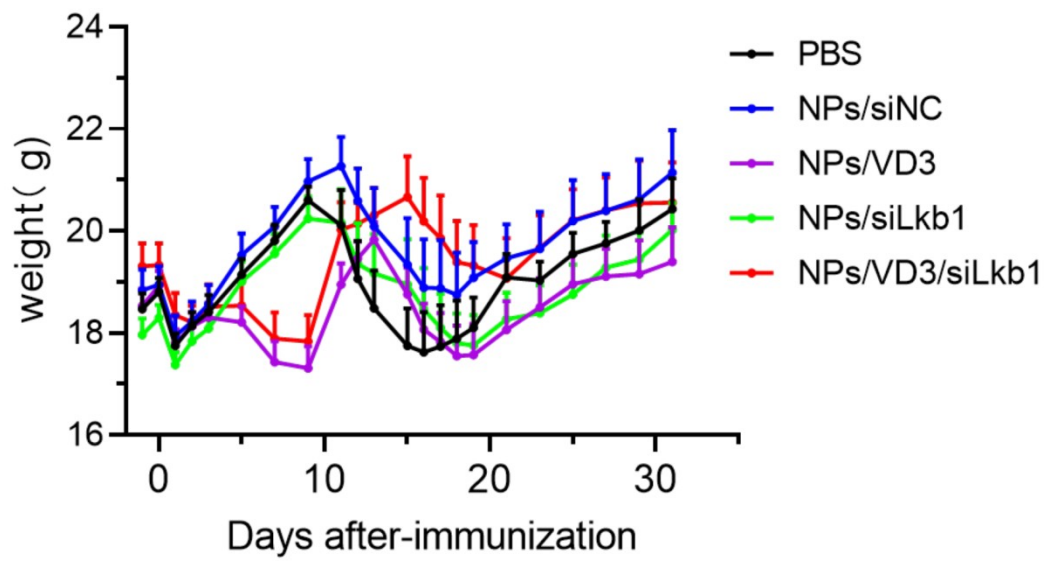

**Figure S3.** Changes in body weight of EAE mice treated with nanoparticles in different groups
