# Supplementary figures and images for: Co-delivery of vitamin D3 and Lkb1 siRNA by cationic lipid-assisted PEG-PLGA nanoparticles to effectively remodel the immune system in vivo
Source: Royal Society of Chemistry journal article supplement (doi:10.1039/d3bm00767g), 2023-01-01

A

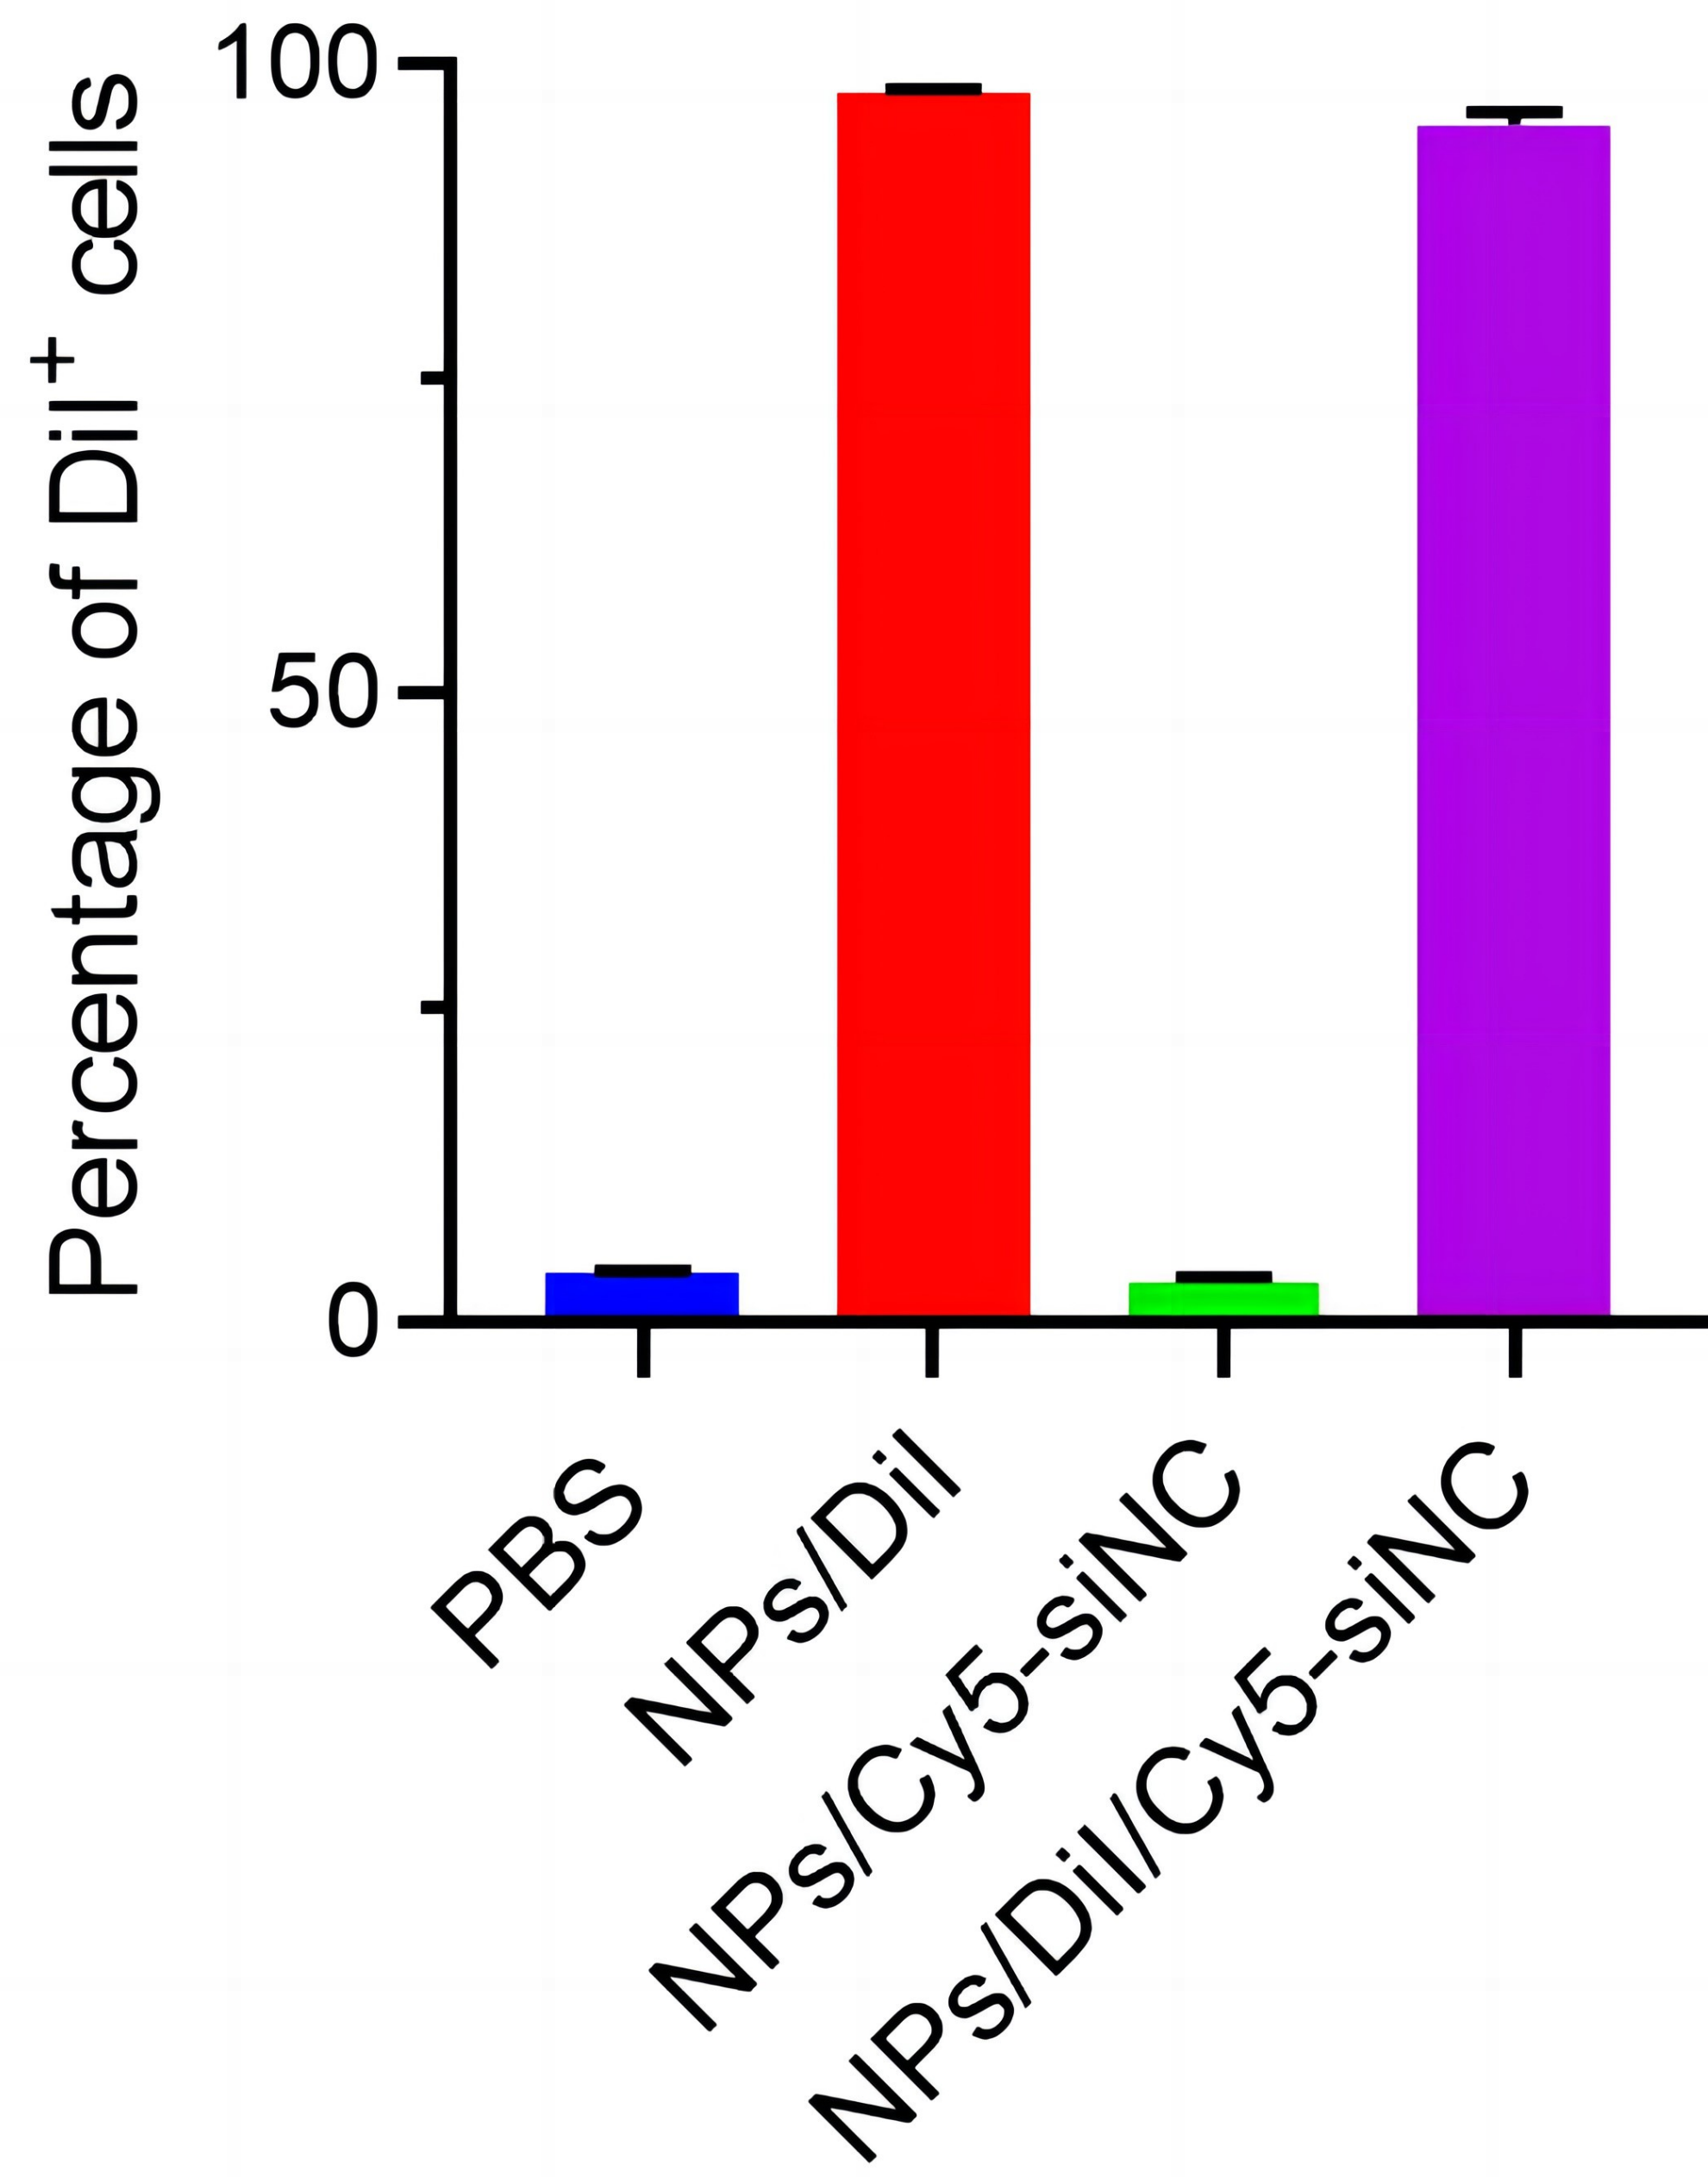

B

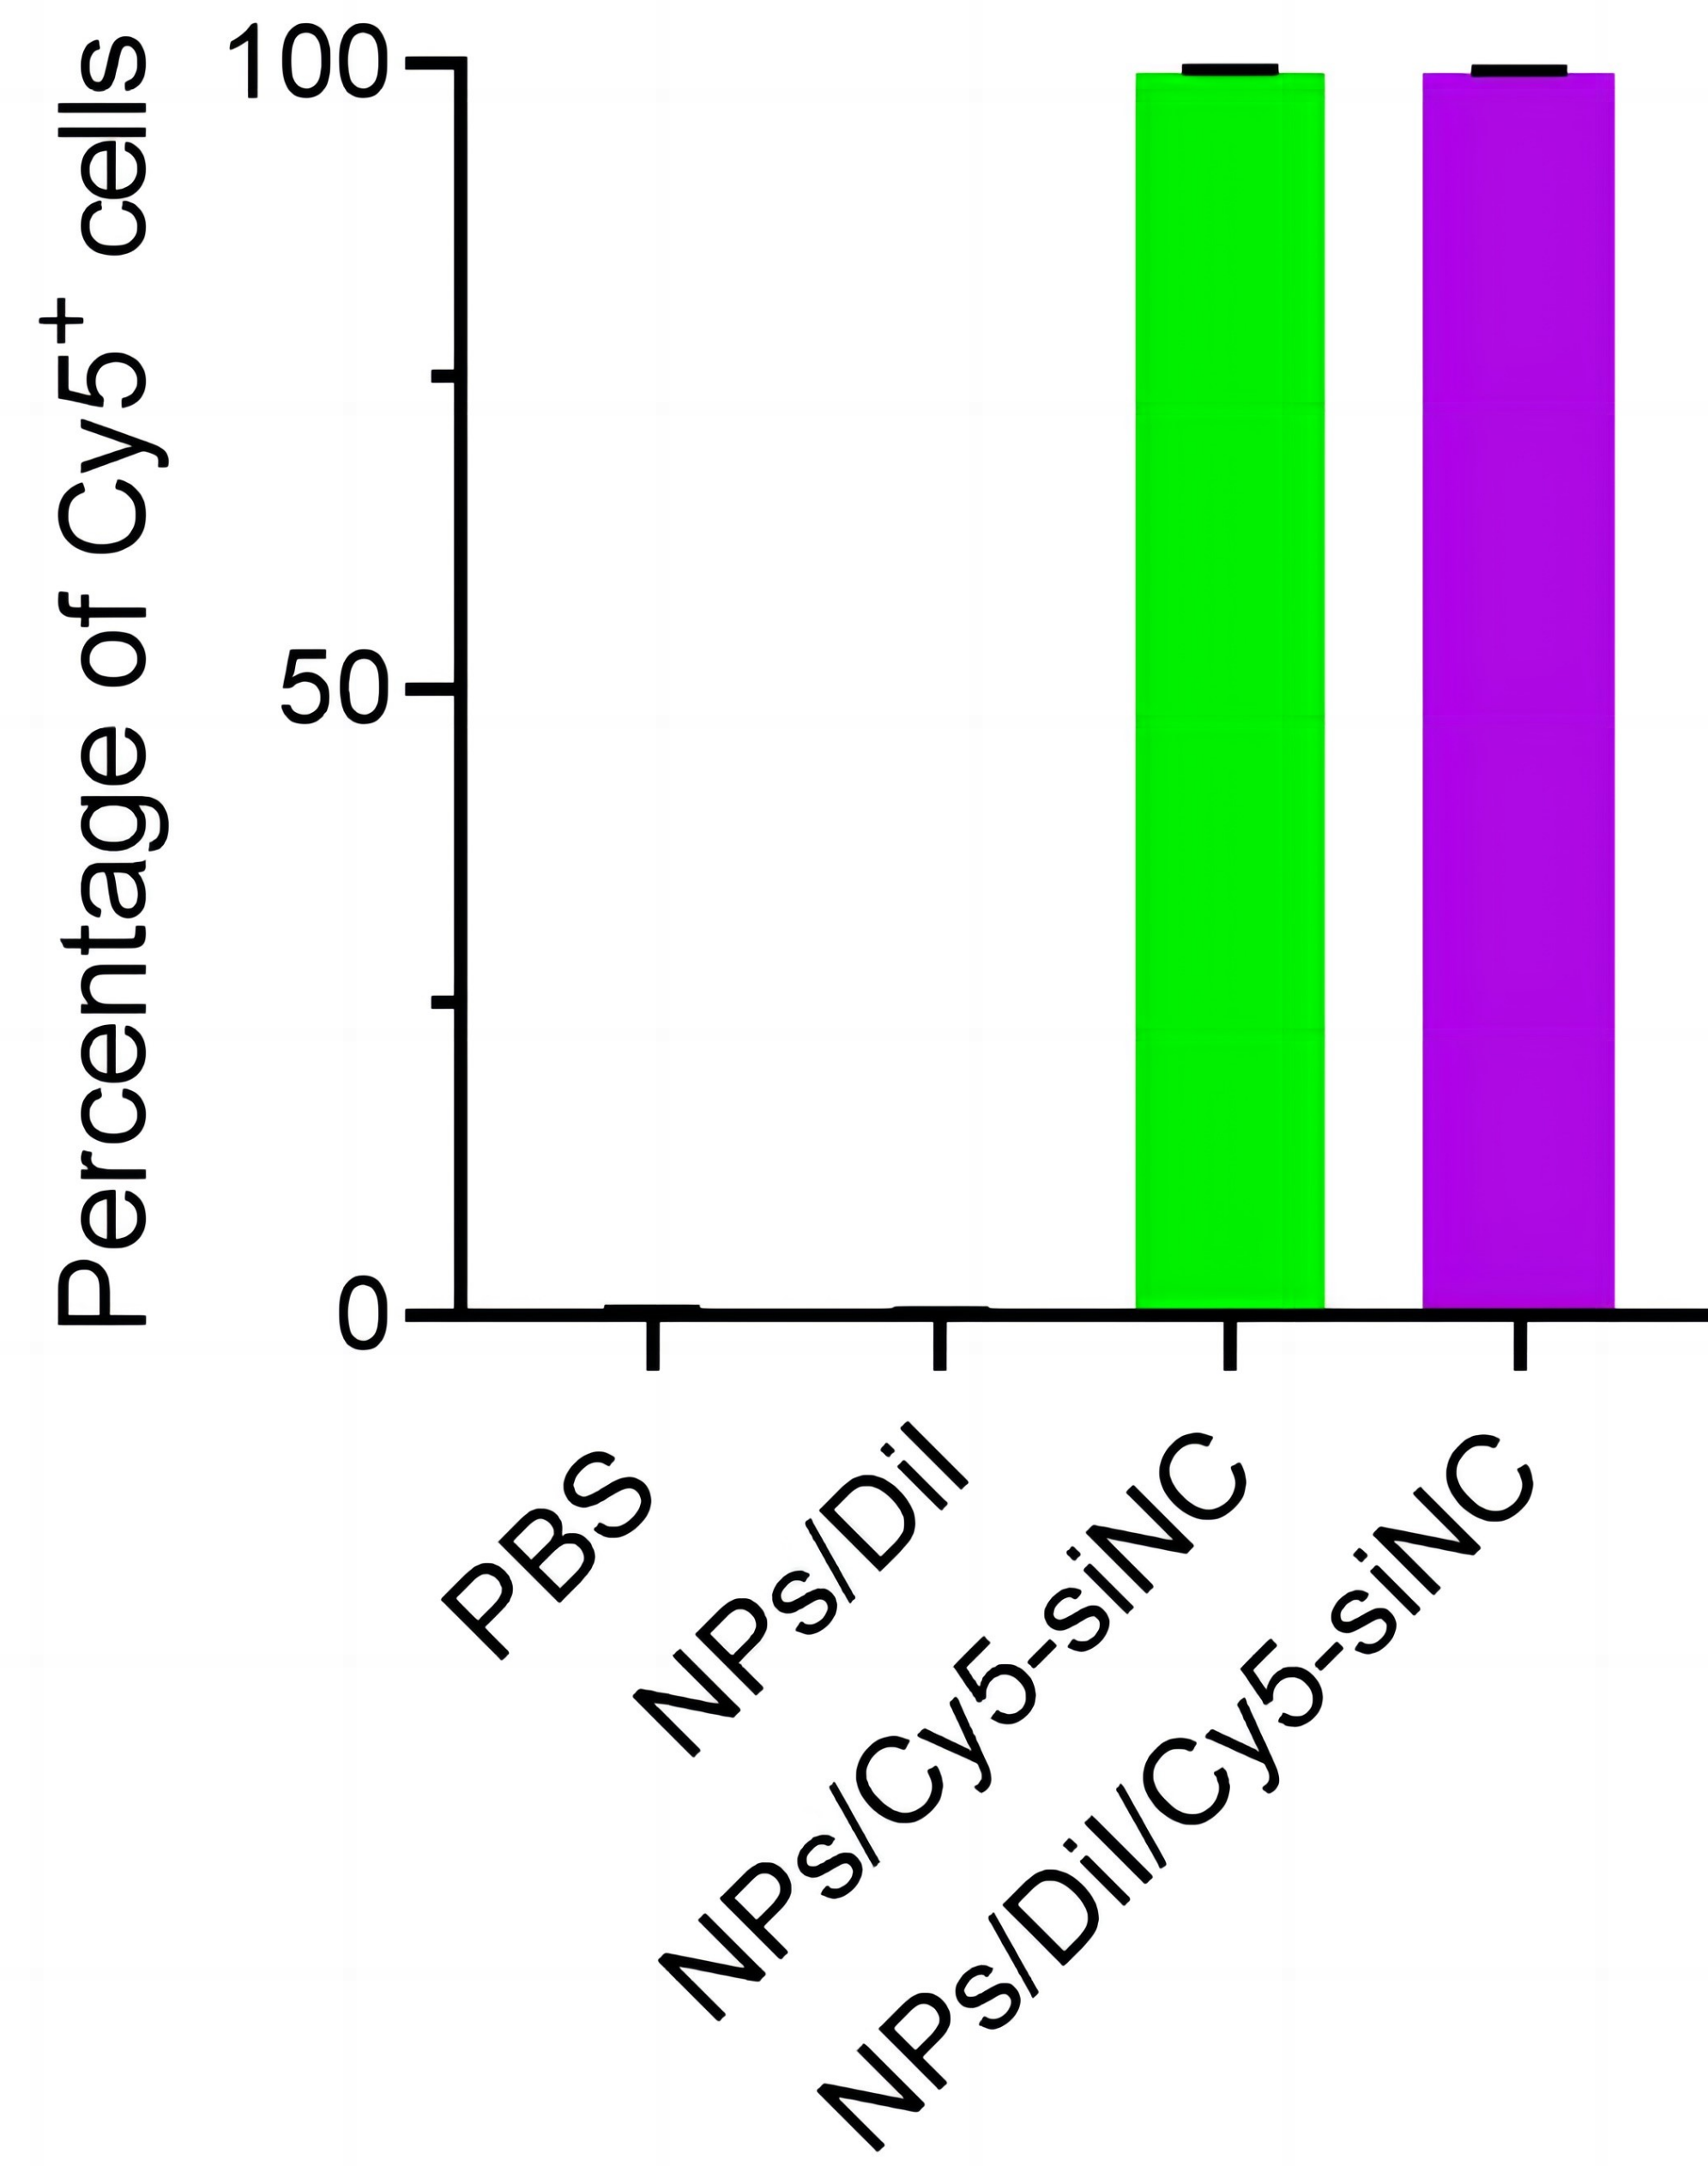

Supplement: d3bm00767g2.pdf [file d3bm00767g2.pdf]

**A**

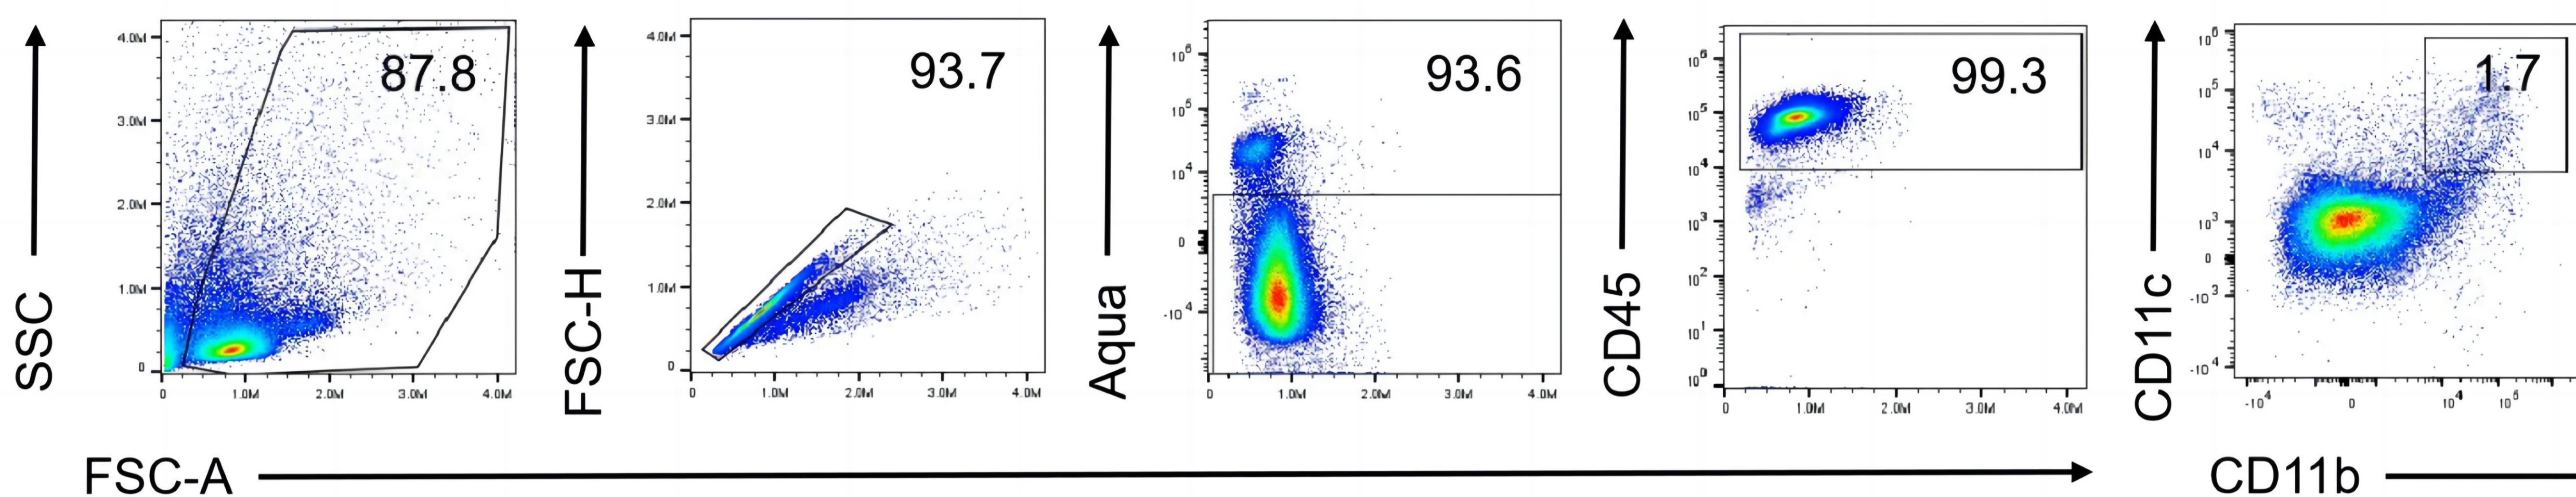

**B**

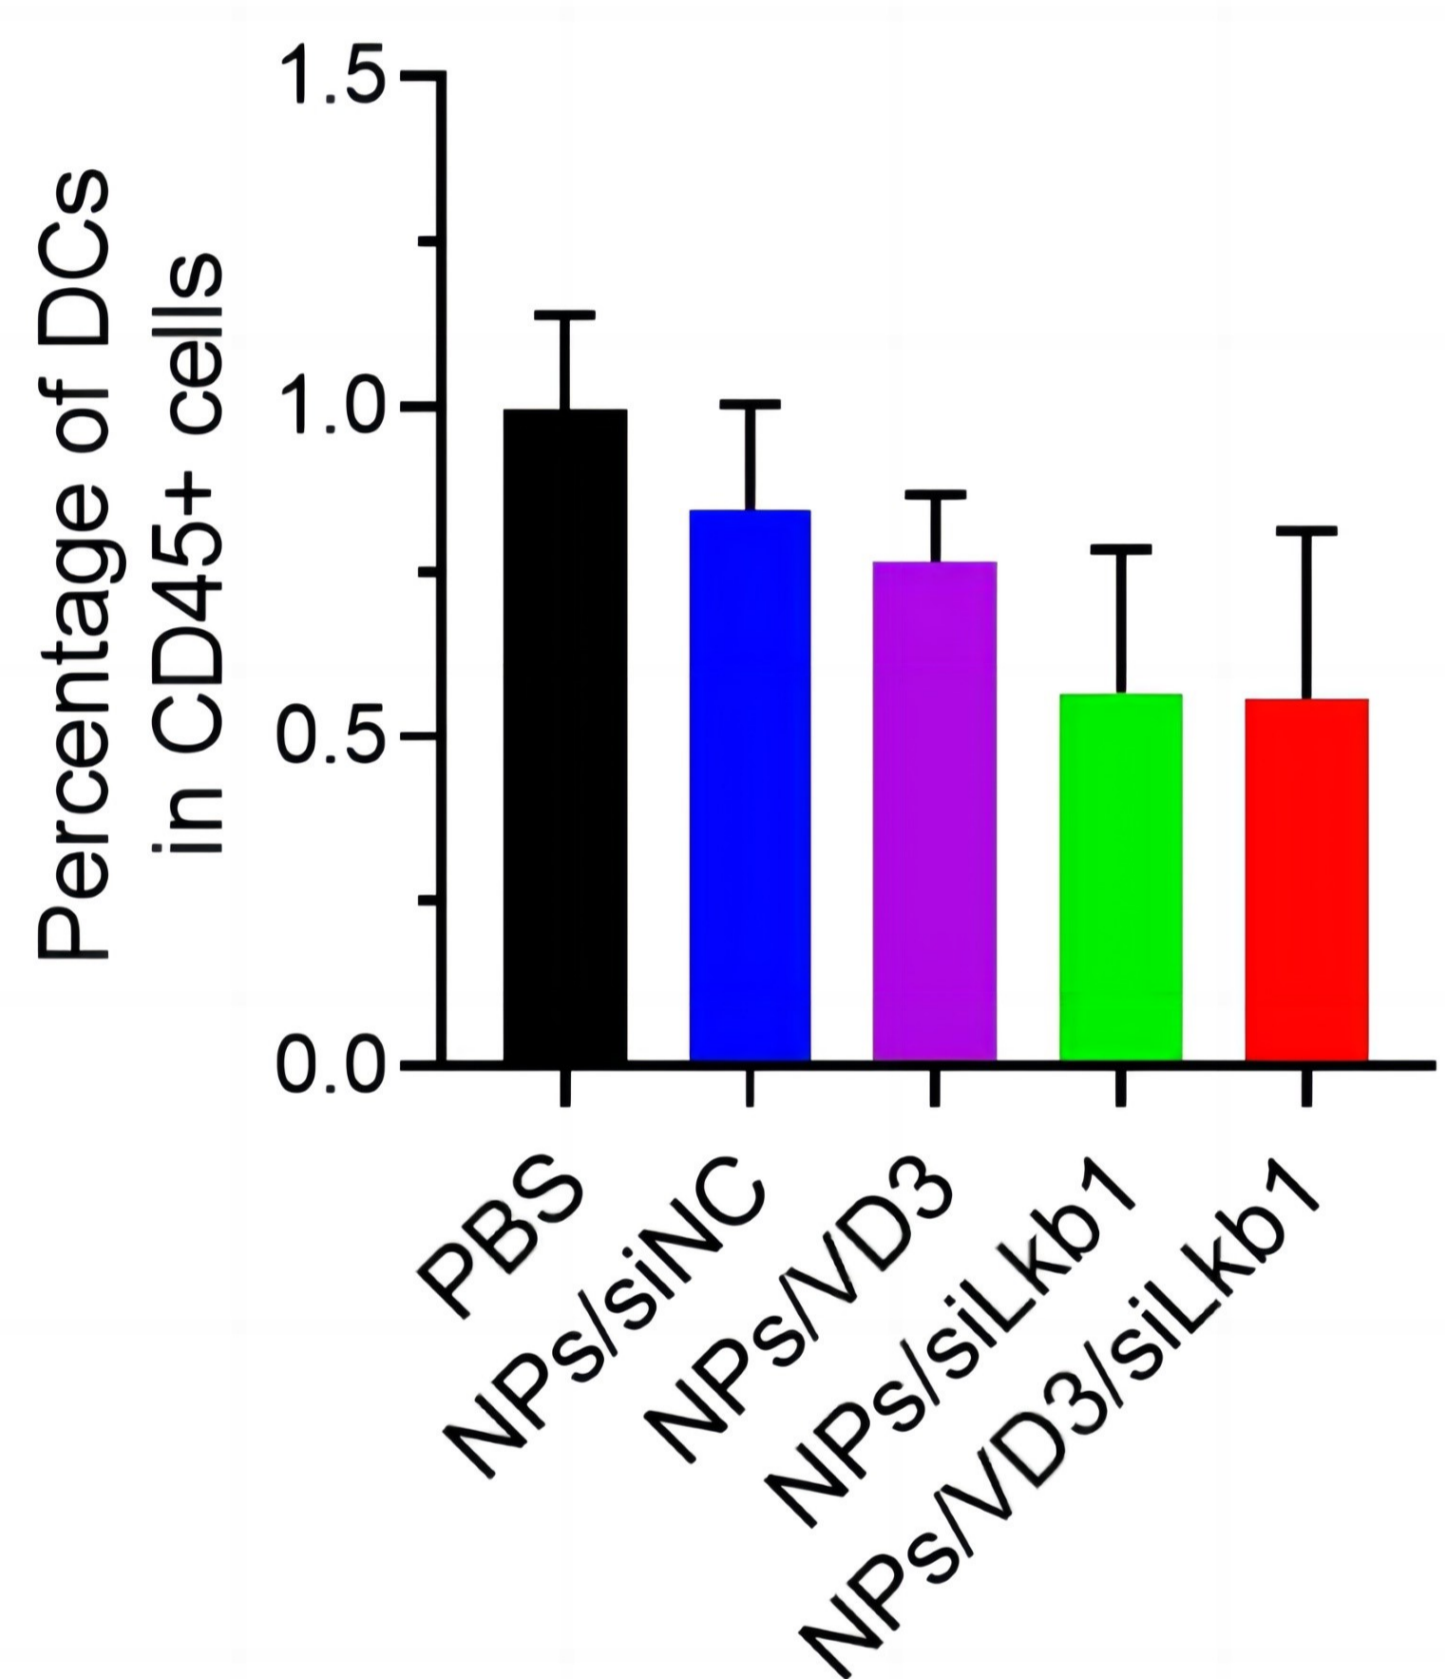

**C**

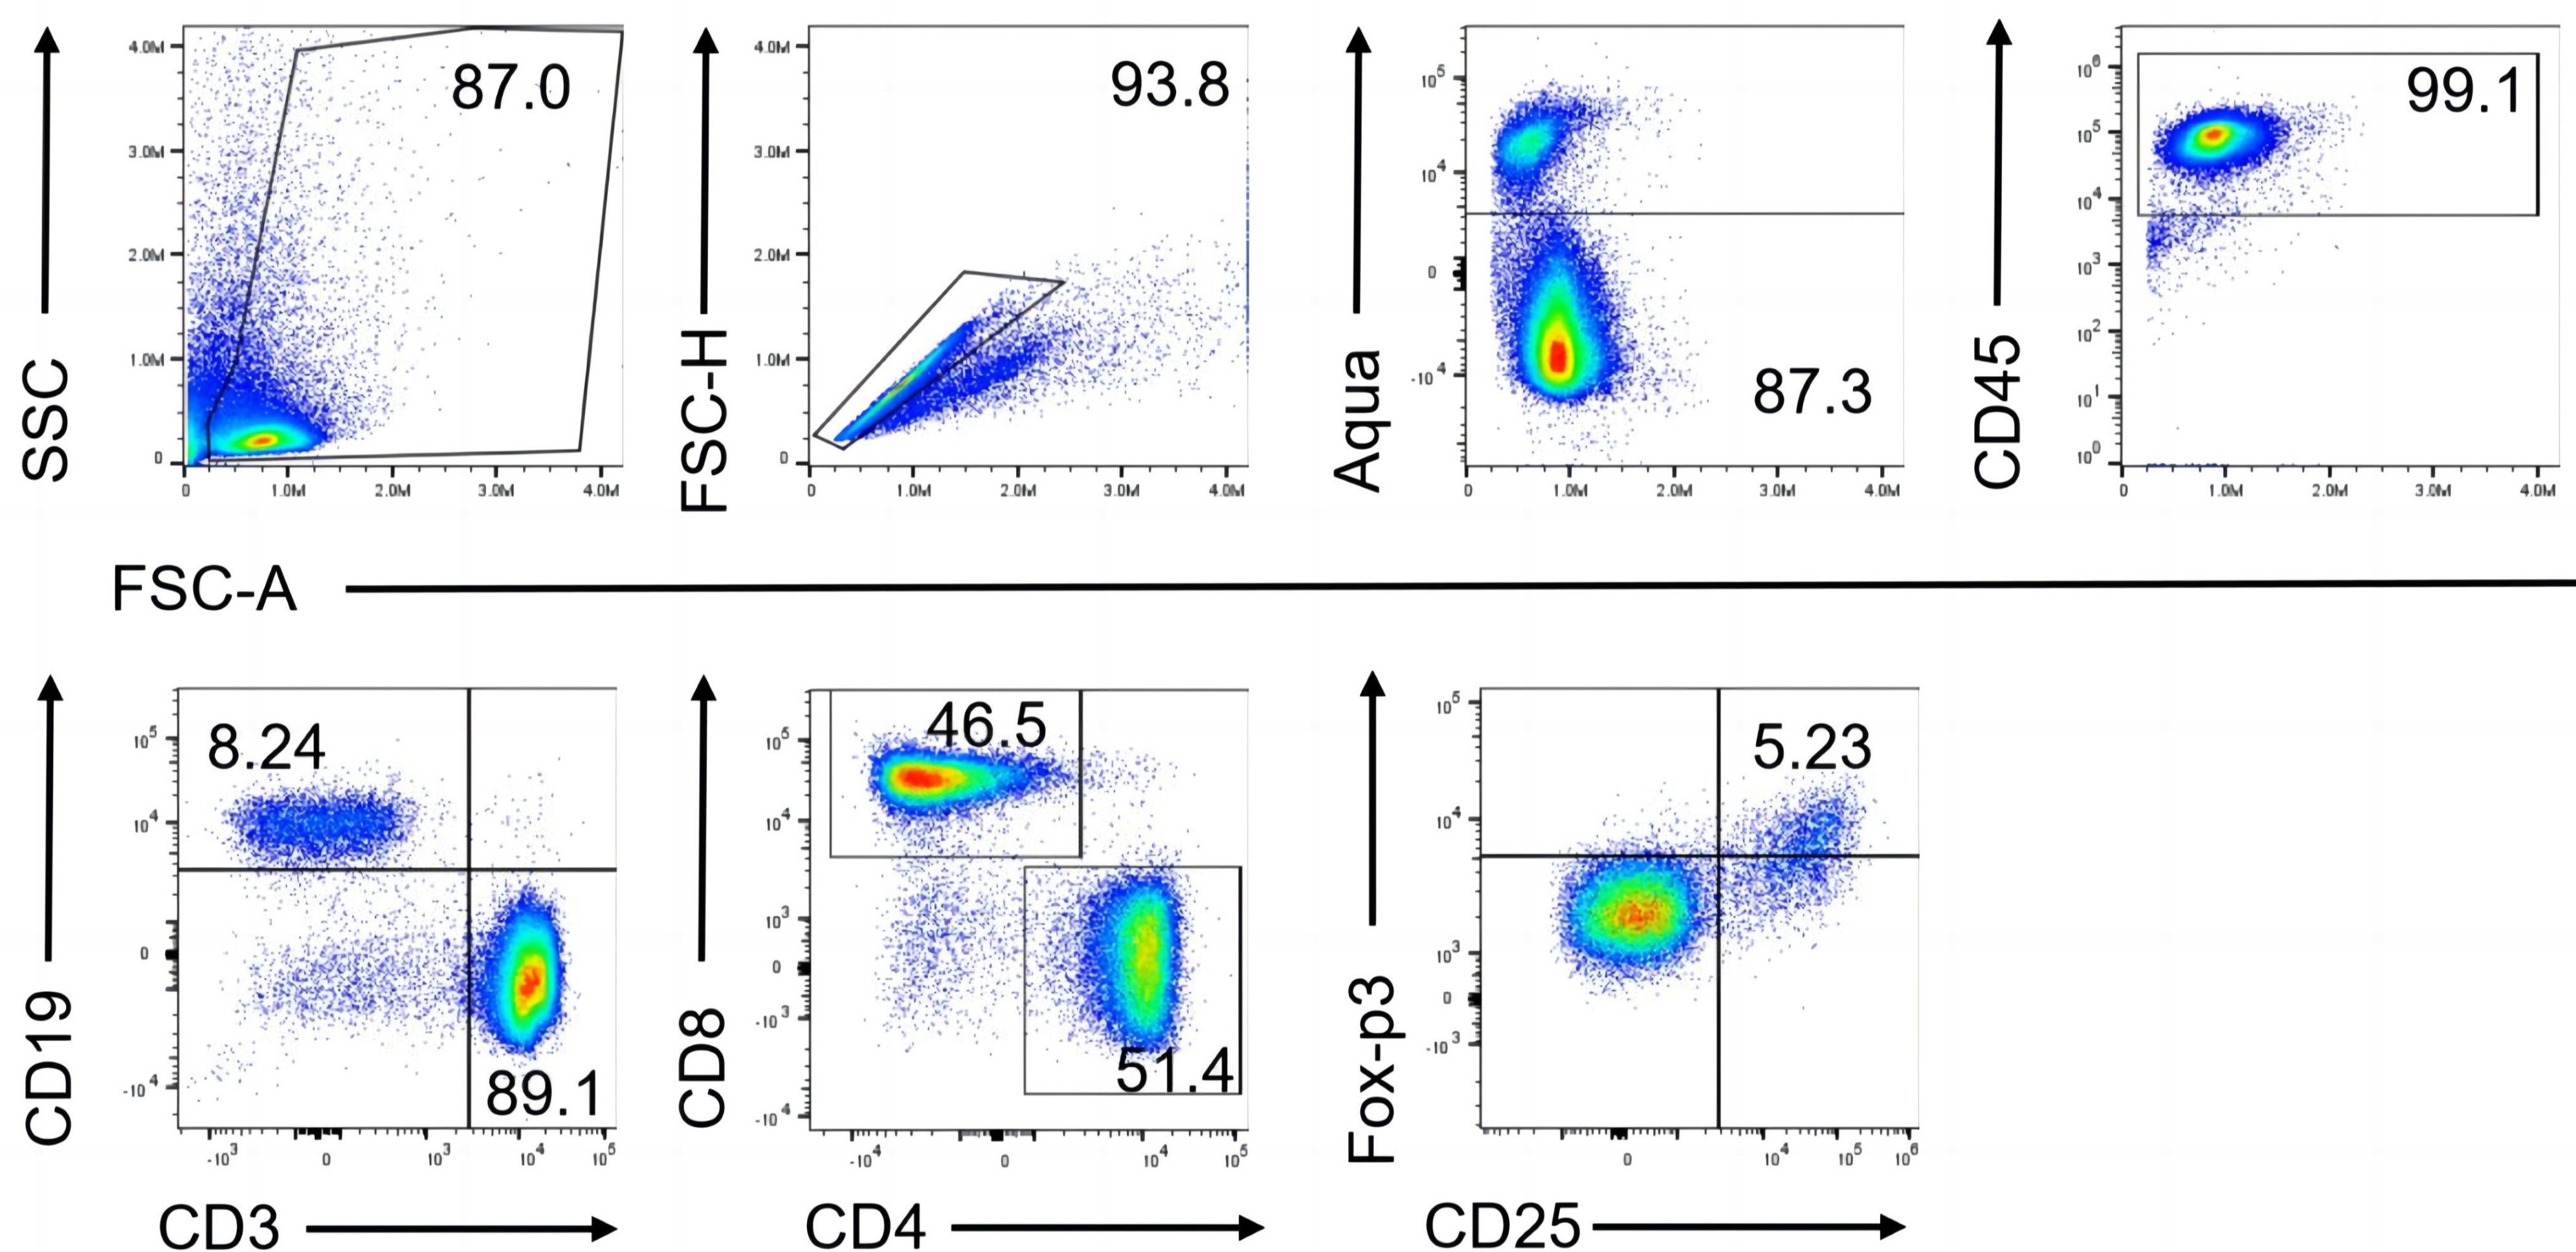

**D**

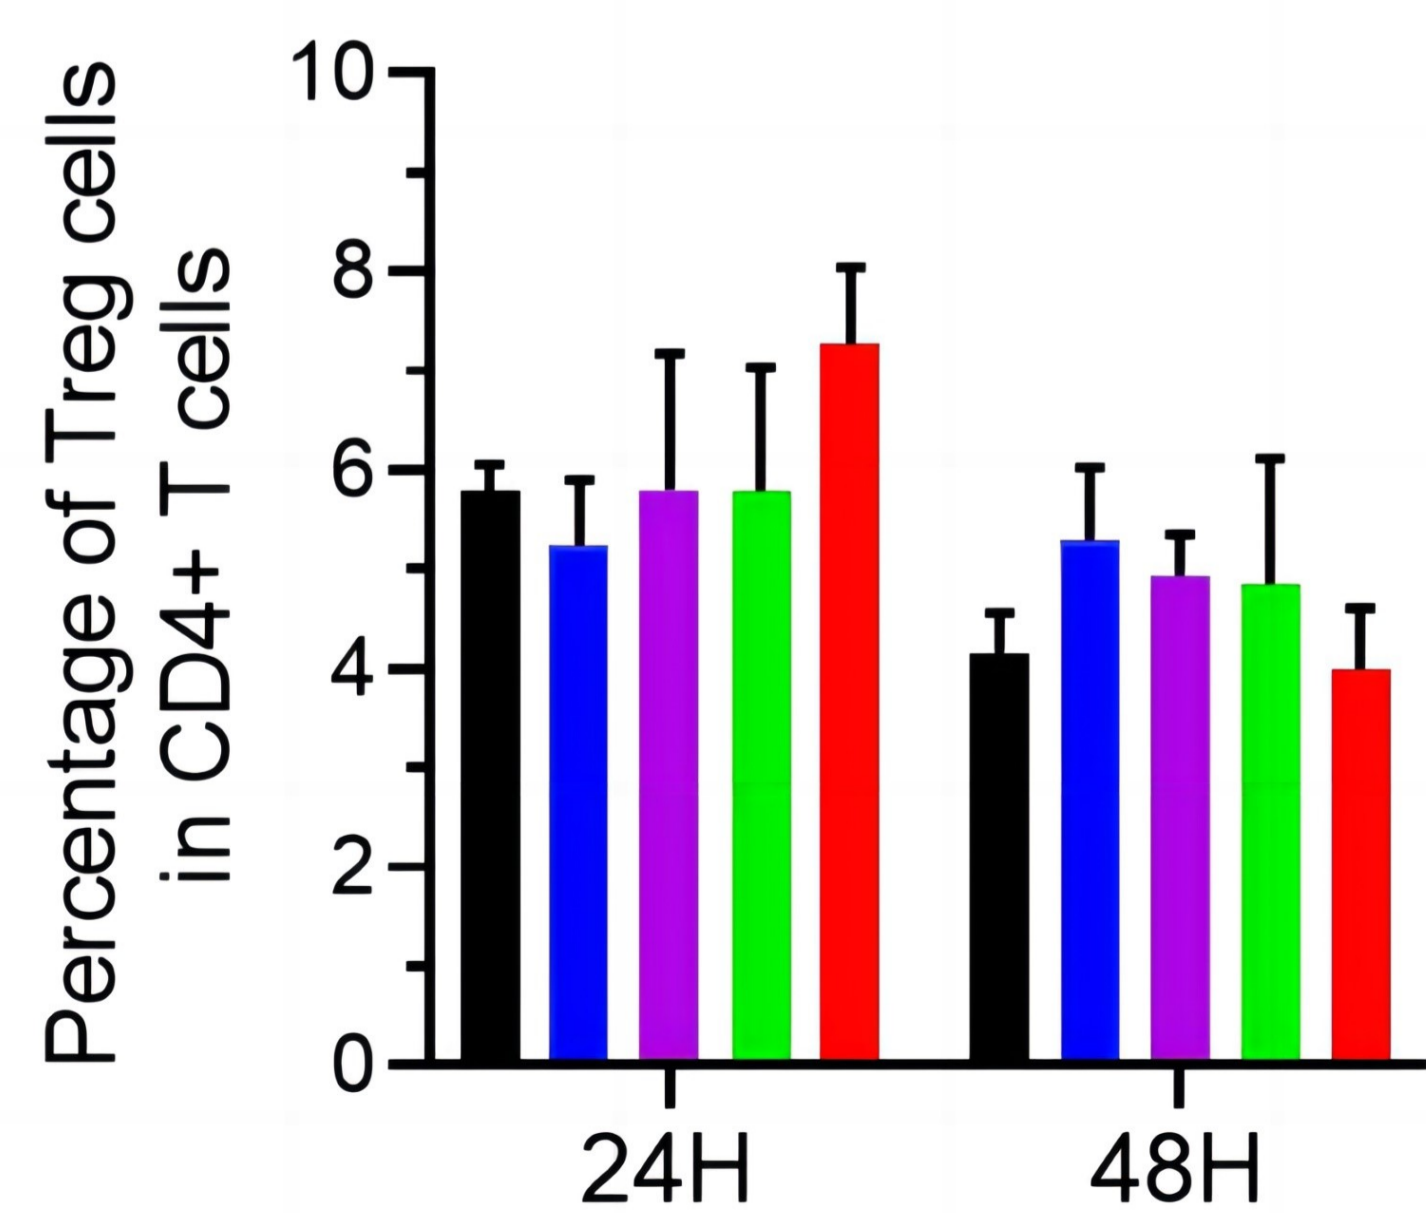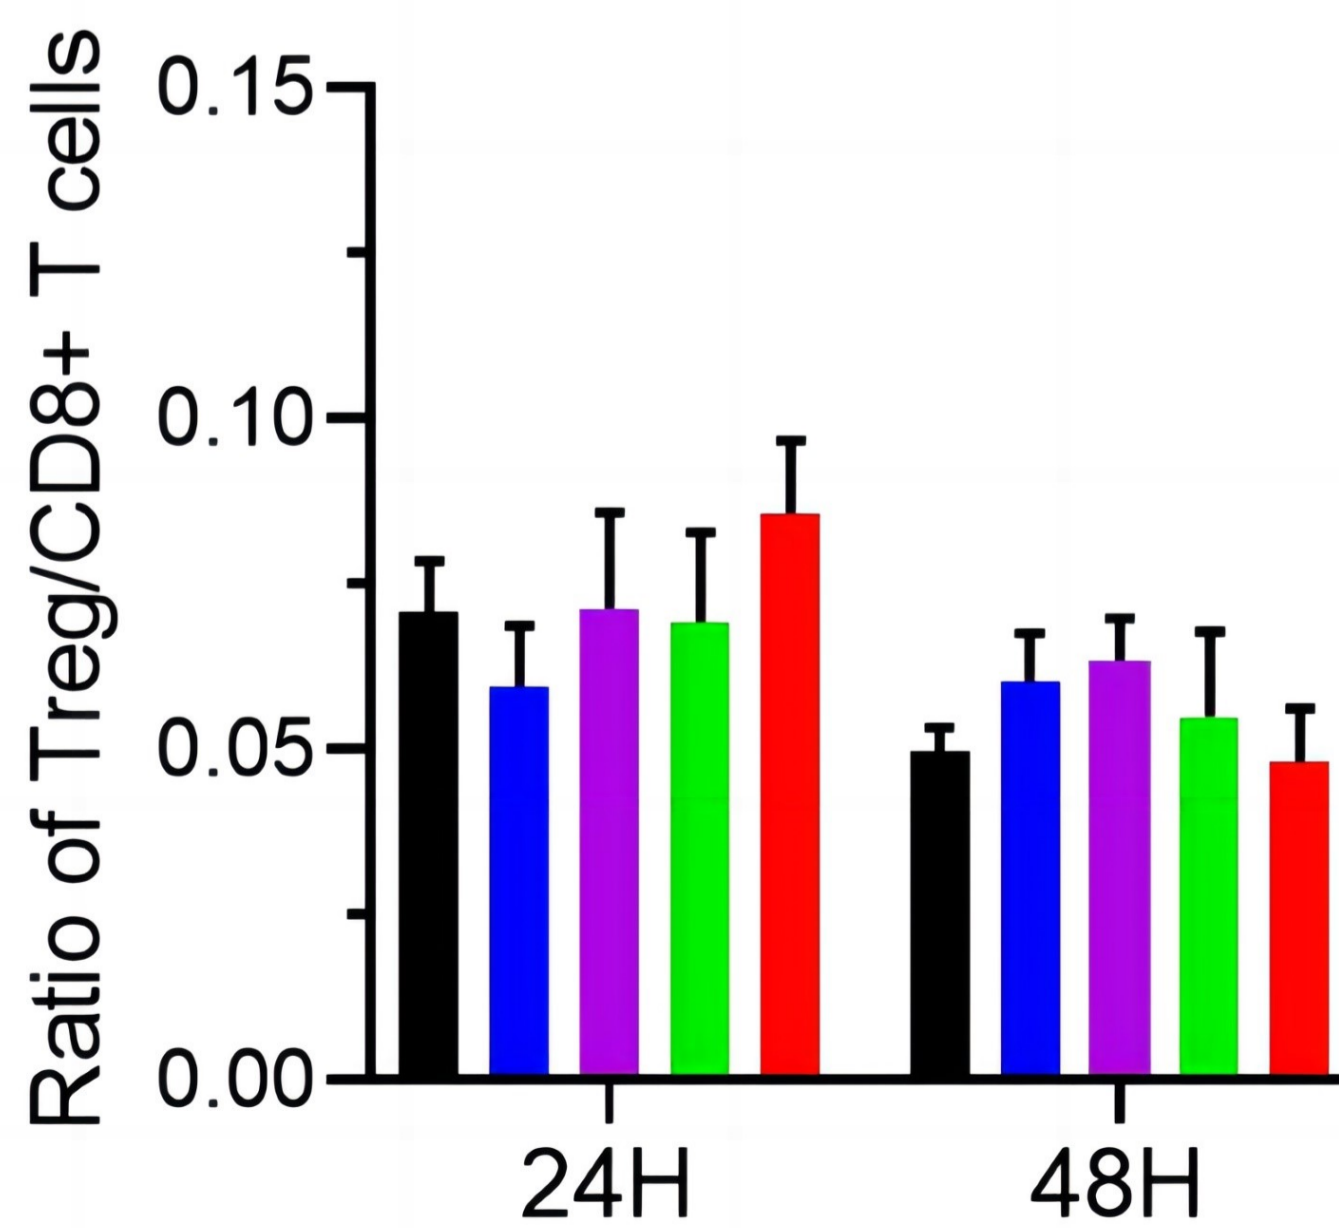

**E**

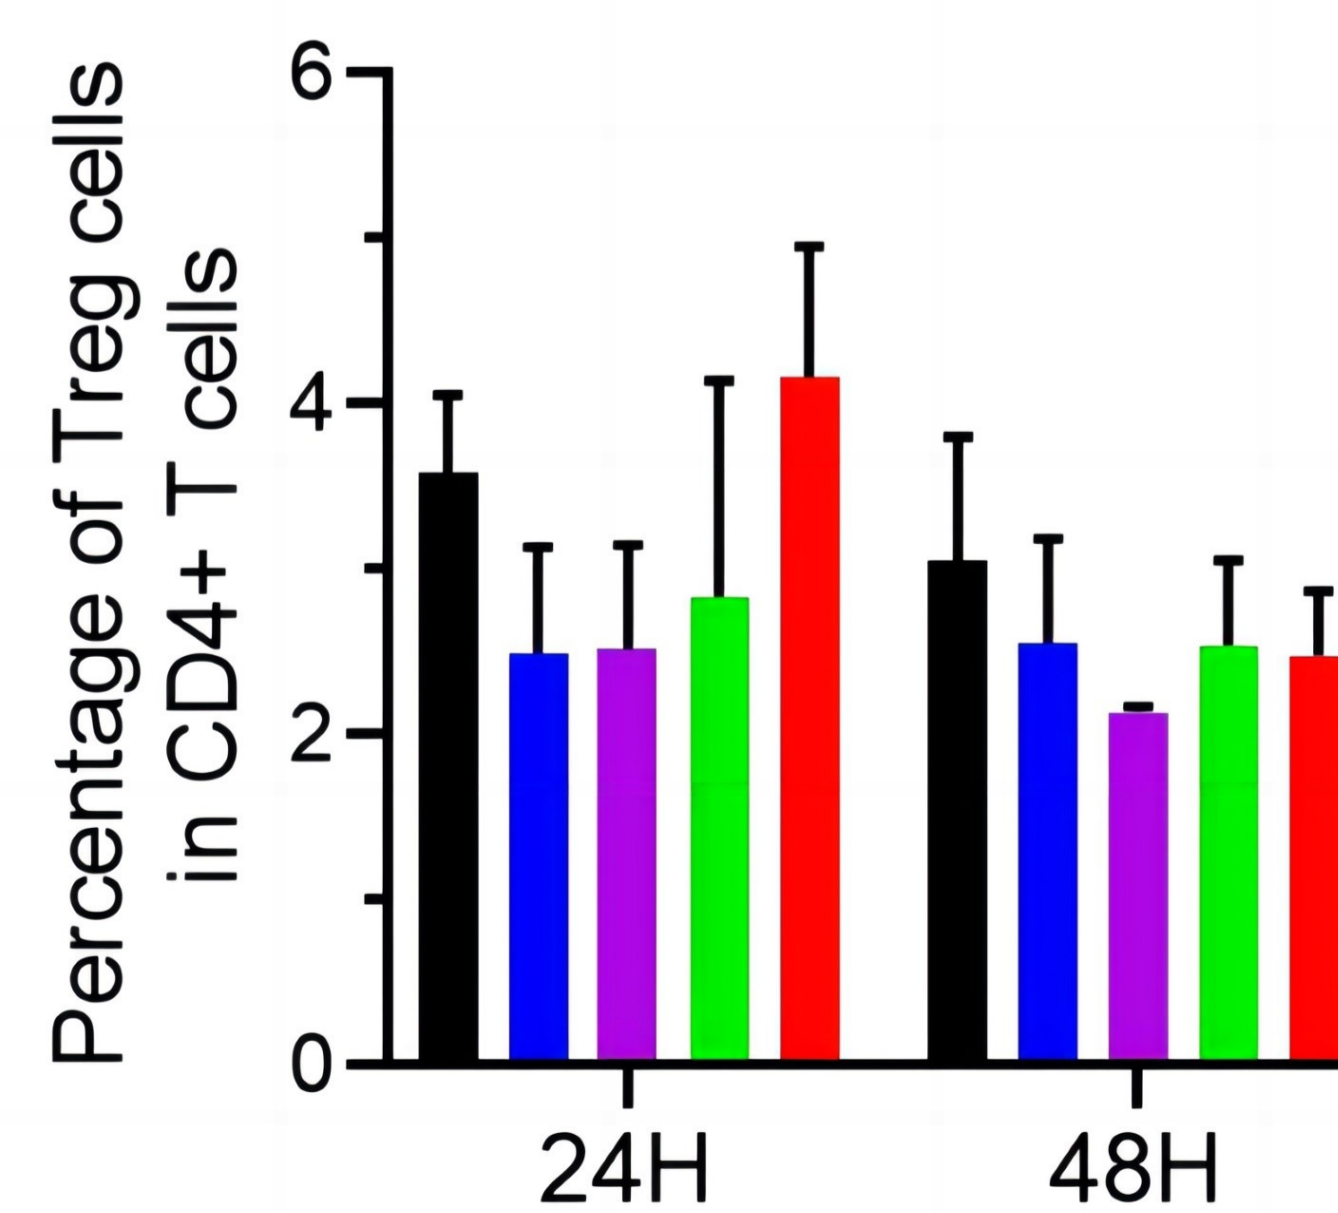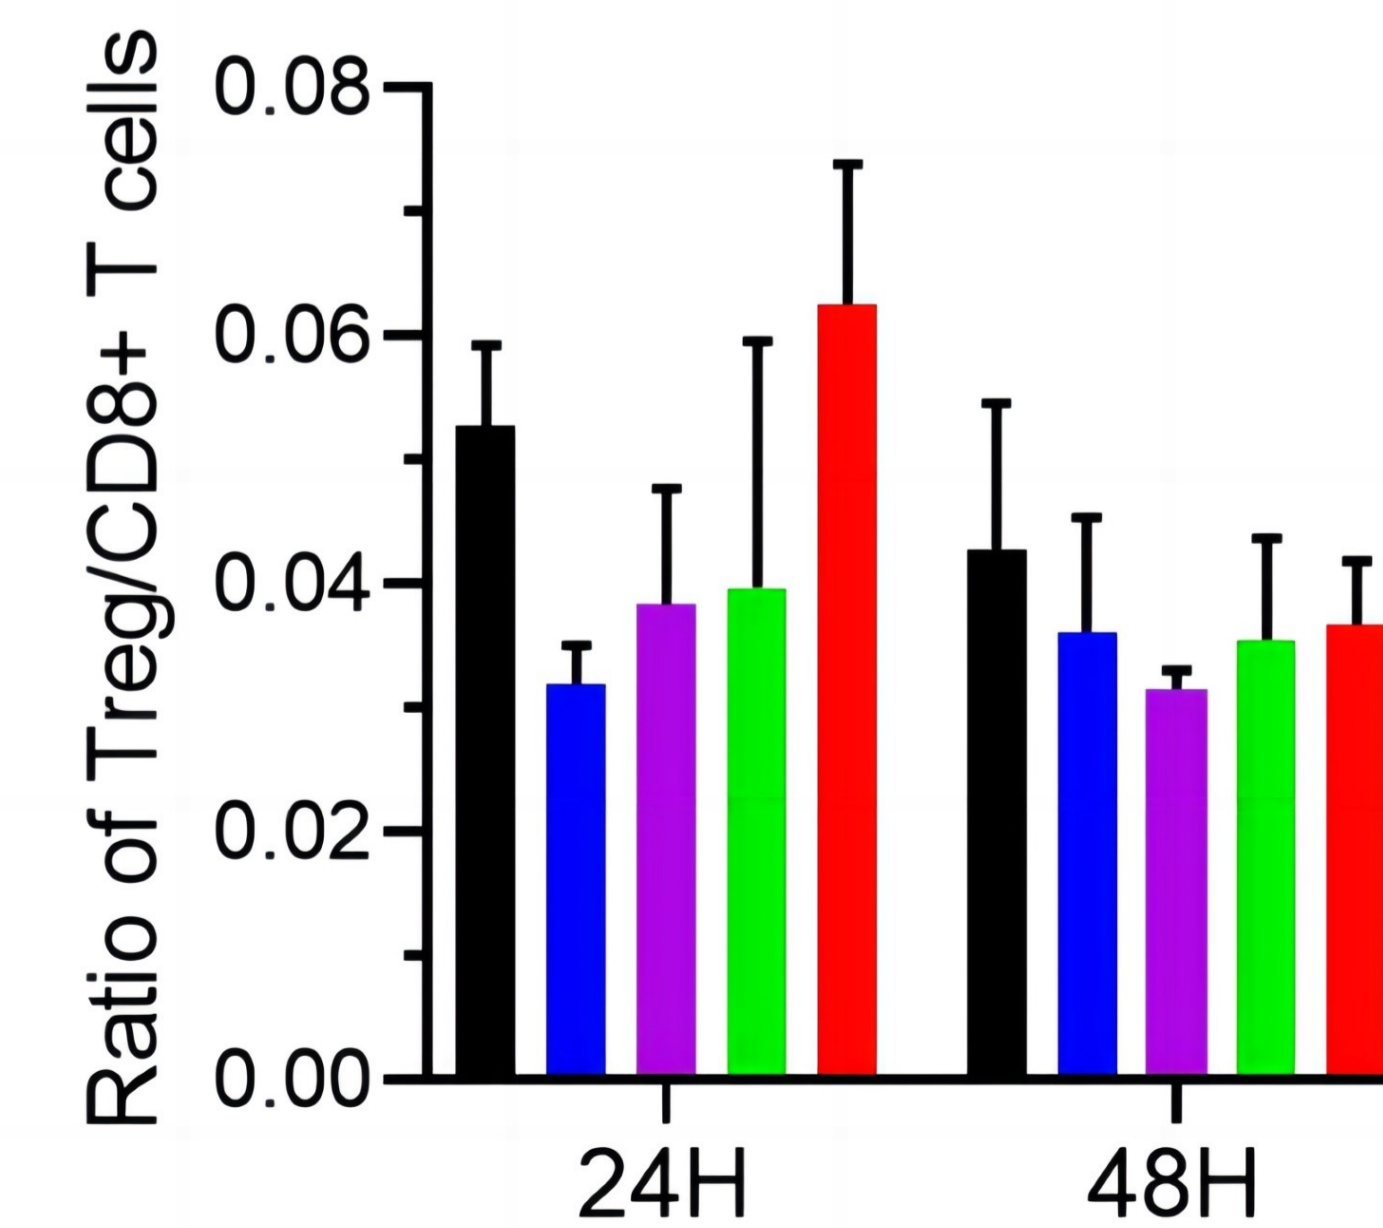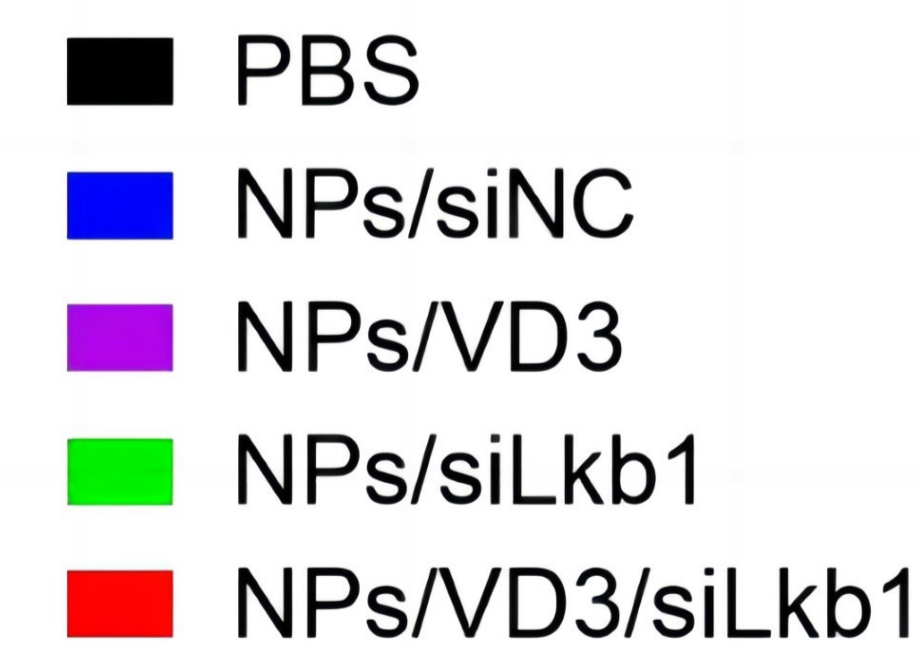

Supplement: d3bm00767g3.pdf [file d3bm00767g3.pdf]

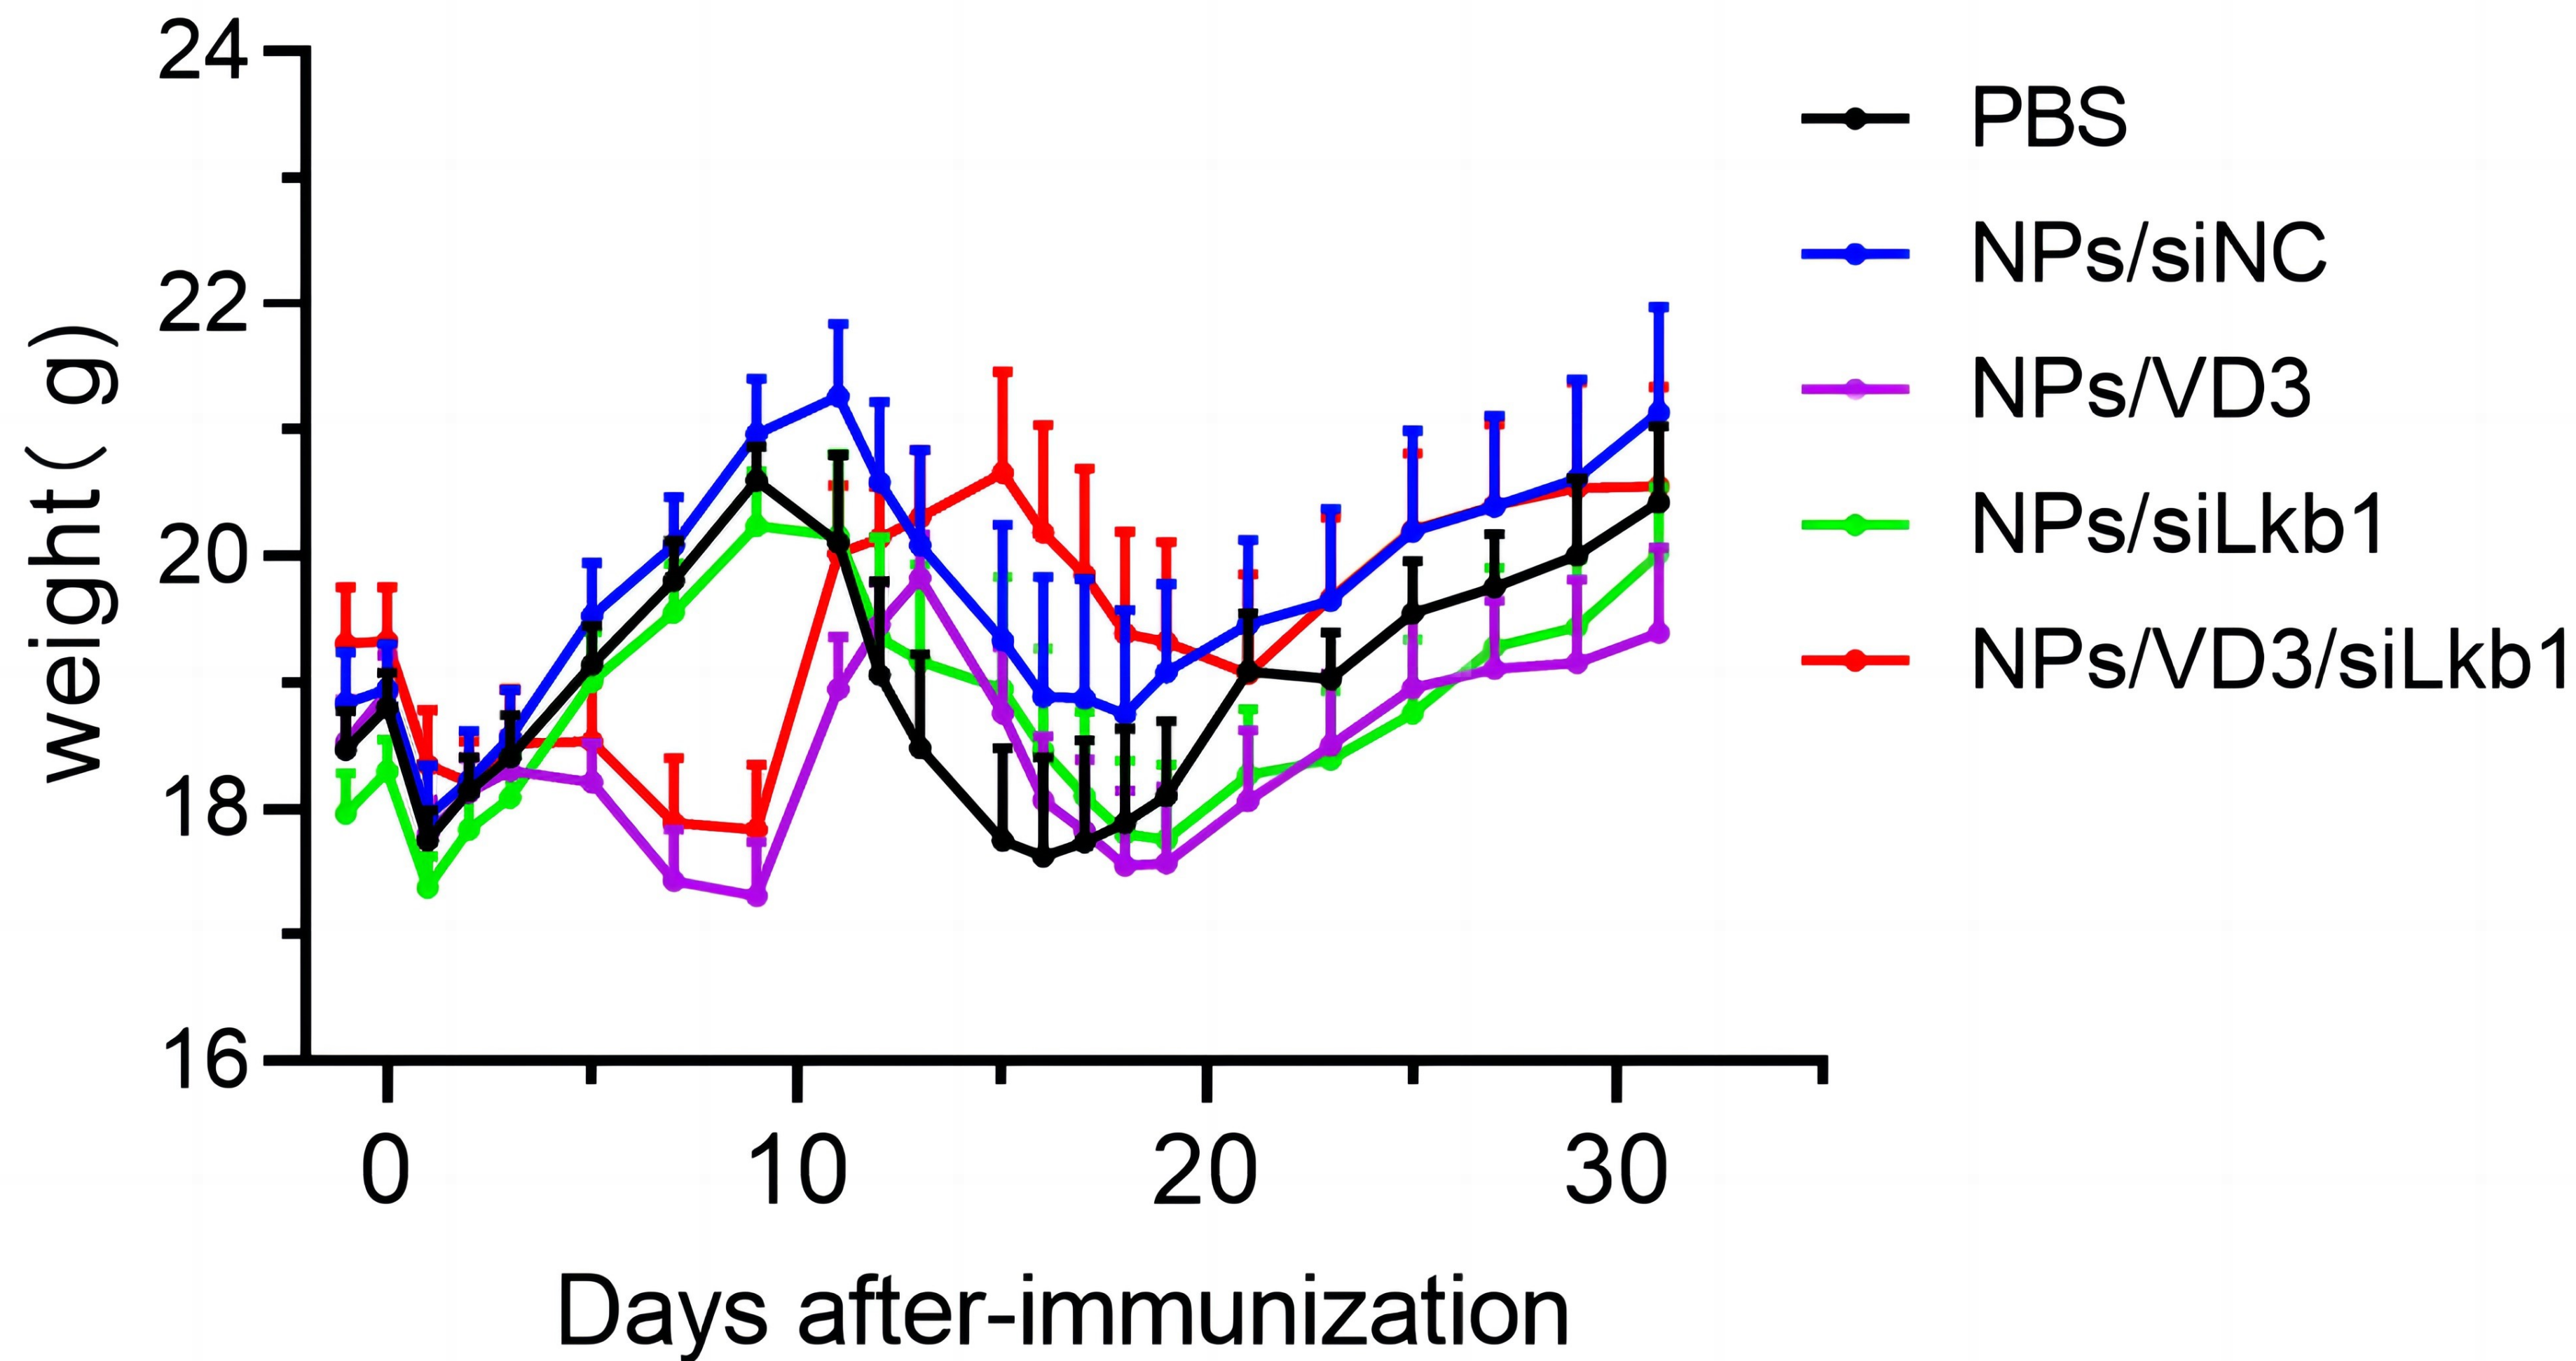

Supplement: d3bm00767g4.pdf [file d3bm00767g4.pdf]
